# Supplementary material
Source: Springer Nature journal article supplement (https://www.springermedizin.de/resource/supplementary/13098_2014_364_MOESM1_ESM.docx/9670898)
Supplement: MOESM1 [file 9670898]

**Figure 1**
